# Supplementary material for: Adiponectin C1q/Tumor Necrosis Factor-Related Protein 13 (CTRP13) Protects against Renal Inflammation and Fibrosis in Obstructive Nephropathy
Source: MDPI journal article supplement (doi:10.3390/biomedicines12010051), 2023-12-25
Supplement: s1 [file s1]

## Supplementary Files

**Table S1.** Plasma CTRP13 levels were decreased in the UUO mice with renal fibrosis.

|                                    | Sham       | 3 days UUO | 7 days UUO | 14 days UUO |
|------------------------------------|------------|------------|------------|-------------|
| Serum CTRP13 concentration (ng/ml) | 128.8±29.6 | 87.5±20.5* | 64.8±13.9* | 55.2±21.7*  |

**Table S2.** Effects of CTRP13 treatment on plasma CTRP13, Scr, Bun and 24-h UP levels in the UUO mice with renal fibrosis

|                                     | Sham+Vehicle | Sham+CTRP13 | UUO+Vehicle | UUO+CTRP13              |
|-------------------------------------|--------------|-------------|-------------|-------------------------|
| Plasma CTRP13 concentration (ng/ml) | 139.6±21.6   | 180.2±13.1* | 69.6±19.3*  | 146.2±15.6 <sup>#</sup> |
| Plasma Scr concentration (mM/L)     | 35.8±7.7     | 37.2±15.6   | 80.3±13.2*  | 52.6±9.7 <sup>#</sup>   |
| Plasma BUN concentration (mM/L)     | 13.4±2.7     | 13.1±3.7    | 29.6±4.2*   | 19.4±4.8 <sup>#</sup>   |
| 24-h UP (mg/day)                    | 9.8±2.6      | 10.6±3.4    | 22.1±3.6*   | 14.2±2.4 <sup>#</sup>   |

Values are presented as mean ± SD. Differences between groups were assessed by unpaired t-test or ANOVA with Bonferroni post hoc test. \* $p < 0.05$  versus Sham or Sham+Vehicle group. <sup>#</sup> $p < 0.05$  versus UUO+Vehicle group. Abbreviations: BUN, blood urea nitrogen; 24 h UP, 24 hour urine protein; SCr, serum creatinine.
